# Supplementary material for: No-waiting segmentectomy: an optimized approach for segmentectomy
Source: PubMed Central journal article supplement — J Thorac Dis. 2021 Feb;13(2):784–8. doi: 10.21037/jtd-20-2661 (PMC7947514; doi:10.21037/jtd-20-2661), 2021-02
Supplement: jtd-13-02-784-dss.pdf [file jtd-13-02-784-dss.pdf]

## Data Sharing Statement

|                     |                                                                                                                                                    |                                                                                                                                   |
|---------------------|----------------------------------------------------------------------------------------------------------------------------------------------------|-----------------------------------------------------------------------------------------------------------------------------------|
| <b>Article Info</b> | http://dx.doi.org/10.21037/jtd-20-2661.                                                                                                            |                                                                                                                                   |
| <b>Item</b>         | <b>Question</b>                                                                                                                                    | <b>Authors' Response<br/>(place "-" if not applicable)</b>                                                                        |
| 1                   | Would you like to share data collected for your study to others?                                                                                   | Yes                                                                                                                               |
| 2                   | If not, would you like to share the reason for your decision?                                                                                      | -                                                                                                                                 |
| 3                   | What data in particular will be shared?                                                                                                            | Segmentectomy between January 2019 to April 2020 in our group will be shared, which has hardly been provided in previous studies. |
| 4                   | Any other documents will be share? Such as study protocol, statistical analysis plan, informed consent form, clinical study report, analytic code. | -                                                                                                                                 |
| 5                   | When will data availability begin?                                                                                                                 | From the publication date.                                                                                                        |
| 6                   | When will data availability end?                                                                                                                   | There is no deadline.                                                                                                             |
| 7                   | To whom will you share the data?                                                                                                                   | Thoracic surgeons who are interested in studies of segmentectomy.                                                                 |
| 8                   | For what type of analysis or purpose?                                                                                                              | For studies to evaluate the technique of segmentectomy.                                                                           |
| 9                   | How or where can the data/documents be obtained?                                                                                                   | Emails could be sent to the address below to obtain the shared data:<br>wangcc@zjcc.org.cn                                        |
| 10                  | Any other restrictions?                                                                                                                            | -                                                                                                                                 |
